# Supplementary material
Source: PubMed Central journal article supplement (PMC3000409)
Supplement: NIHMS252555-supplement-Table.pdf [file NIHMS252555-supplement-Table.pdf]

## SUPPLEMENTARY DATA TABLES

### MOB Buffers/ Reagents:

|                              |                                                                                                                                                                                    |
|------------------------------|------------------------------------------------------------------------------------------------------------------------------------------------------------------------------------|
| Protease K                   |                                                                                                                                                                                    |
| Lysing Buffer                | 50 mM Tris-HCl (pH 8.5)<br>50 mM EDTA<br>1% SDS<br>10 mM NaCl                                                                                                                      |
| MOB Binding Buffer 1         | 7 M Guanidine HCl in 1M Citric Buffer (see below)*                                                                                                                                 |
| MOB Binding Buffer 2         | 7M Guanidine HCl in 3M Citric Acid (see below)#                                                                                                                                    |
| IPA                          | 100% Isopropanol                                                                                                                                                                   |
| Magnetic Beads               | silica superparamagnetic particles (Novagen MagPrep)                                                                                                                               |
| MOB Wash Buffer 1            | 37.5 ml 100% IPA and 12.5 ml 8M Sodium Perchlorate                                                                                                                                 |
| MOB Wash Buffer 2            | 80% Ethanol                                                                                                                                                                        |
| Bisulfite Conversion Buffers | 12 $\mu$ l .02 M Hydroquinone<br>200 $\mu$ l 6.9 M Sodium Bisulfite ( <b>adjusted to pH 5-5.5 with NaOH</b> )<br>6 $\mu$ l 2M Sodium Hydroxide<br>120 $\mu$ L 10M Sodium Hydroxide |
| MOB Elution Buffer           | 10 mM Tris-HCl (pH 8.5)                                                                                                                                                            |

**Supplementary Table 1.** MOB reagents and buffers are provided with appropriate concentrations.

| <i>Gene</i>                | <b>Methylated Forward</b>           | <b>Methylated Reverse</b>          |
|----------------------------|-------------------------------------|------------------------------------|
| <i>p16<sup>INK4A</sup></i> | 5'-GGTTGGTTTTTTATTTTGTAGAGTGAGGT-3' | 5'-AACCACTCTAACCAAAAATACAAACACA-3' |
| <i>p15<sup>INK4B</sup></i> | 5'-GGTTTTTTATTTTGTAGAGCGAGGC-3'     | 5'-TAACCGCAAAATACGAACGCG-3'        |
| <i>ASC/TMS1</i>            | 5'-GCGGGGAGTTTAGGTTTCGTTTC-3'       | 5'-CCAACGCATCCAAAATAACGTCG-3'      |

**Supplementary Table 2.** Sequence of primers used for MSP and MS-qFRET analysis.

| <b>Patient#</b> | <b>Histology</b> | <b>Size of Tumor</b> | <b>Stage</b> | <b>MOB</b> | <b>PC/Bst/MSP</b> |
|-----------------|------------------|----------------------|--------------|------------|-------------------|
| 1               | Adeno            | 2.5 cm               | Stage I      | -          | -                 |
| 2               | Adeno            | 3 cm                 | Stage I      | +          | +                 |
| 3               | Squamous         | 5.5 cm               | Stage I      | +          | +                 |
| 4               | Adeno            | 3 cm                 | Stage III    | +          | -                 |
| 5               | Normal           |                      |              | -          | -                 |
| 6               | Normal           |                      |              | -          | -                 |
| 7               | Normal           |                      |              | -          | -                 |
| 8               | Normal           |                      |              | -          | -                 |
| 9               | Squamous         | 2.5 cm               | Stage I      | +          | -                 |
| 10              | Normal           |                      |              | -          | -                 |
| 11              | Squamous         | 1.8 cm               | Stage I      | +          | -                 |
| 12              | Squamous         | 3 cm                 | Stage III    | +          | +                 |
| 13              | Normal           |                      |              | -          | -                 |
| 14              | Adeno            | 1.5 cm               | Stage I      | -          | -                 |
| 15              | Normal           |                      |              | -          | -                 |
| 16              | Squamous         | 1.5 cm               | Stage I      | +          | +                 |
| 17              | Normal           |                      |              | -          | -                 |
| 18              | Normal           |                      |              | -          | -                 |
| 19              | Adeno            | 3.8 cm               | Stage II     | -          | -                 |
| 20              | Normal           |                      |              | -          | -                 |
| 21              | Normal           |                      |              | -          | -                 |
| 22              | Adeno            | 3.0 cm               | Stage III    | +          | +                 |
| 23              | Squamous         | 2.5 cm               | Stage III    | +          | +                 |
| 24              | Normal           |                      |              | +          | -                 |
| 25              | Squamous         | 7.5 cm               | Stage I      | -          | -                 |
| 26              | Adeno            | 3.2 cm               | Stage I      | -          | -                 |
| 27              | Adeno            | 1.0 cm               | Stage I      | +          | -                 |
| 28              | Squamous         | 2.2 cm               | Stage III    | +          | +                 |
| 29              | Normal           |                      |              | -          | -                 |
| 30              | Adeno            | 2.0 cm               | Stage III    | +          | -                 |
| 31              | Squamous         | 3.0 cm               | Stage III    | +          | +                 |
| 32              | Adeno            | 3.0 cm               | Stage III    | +          | +                 |
| 33              | Normal           |                      |              | +          | -                 |
| 34              | Normal           |                      |              | -          | -                 |
| 35              | Adeno            | 2.0 cm               | Stage II     | -          | -                 |
| 36              | Carcinoma        | 8.0 cm               | Stage III    | +          | +                 |
| 37              | Normal           |                      |              | -          | -                 |
| 38              | Adeno            | 2.5 cm               | Stage III    | +          | -                 |
| 39              | Adeno            | 2.8 cm               | Stage II     | +          | +                 |
| 40              | Adeno            | 3.5 cm               | Stage II     | +          | +                 |
| 41              | Adeno            | 4.9 cm               | Stage II     | -          | -                 |

|    |               |        |           |   |   |
|----|---------------|--------|-----------|---|---|
| 42 | Adenosquamous | 1.5 cm | Stage III | + | - |
| 43 | Adeno         | 1.5 cm | Stage II  | - | - |
| 44 | Adeno         | 2.0 cm | Stage III | + | + |
| 45 | Normal        |        |           | - | - |
| 46 | Adeno         | 3.2 cm | Stage II  | + | - |
| 47 | Adeno         | 2.0 cm | Stage III | + | + |
| 48 | Squamous      | 7.0 cm | Stage II  | + | - |
| 49 | Normal        |        |           | - | - |

**Supplementary Table 3.** Methylation analysis of *p16<sup>INK4a</sup>* promoter compared for MOB and PC/Bst/MSP in serum DNA from normal and cancer patients. MOB was able to detect 23 out of 31 cancerous samples while PC/Bst/MSP detected only 14 out of 31.
